# Supplementary material for: Successful Treatment of Persistent SARS-CoV-2 Infection in a B-Cell Depleted Patient with Activated Cytotoxic T and NK Cells: A Case Report
Source: Int J Mol Sci. 2021 Oct 10;22(20):10934. doi: 10.3390/ijms222010934 (PMC8535727; doi:10.3390/ijms222010934)
Supplement: Supplementary file 1 [file ijms-22-10934-s001.zip › ijms-1391055-supplementary.pdf]

**Table S1. Frequency distribution of 24 T cell receptor (TCR) V $\beta$  families within different T cell subsets.**

The table depicts frequency (%) of 24 studied TCR V $\beta$  clones within conventional helper T cell (Th), cytotoxic T cell (Tc) and regulatory T cell (Tregs) subsets of healthy donors and the B-cell deficient patient. Individual results for three healthy donors (C1, C2 and C3) are shown together with the mean value (*Mean*).

| No. | V $\beta$ TCR  | Th cells<br>(CD3+CD4+FoxP3-) |     |      |      |         | Tc cells<br>(CD3+CD8+) |     |      |      |         | Tregs<br>(CD3+CD4+CD25HighFoxP3+) |     |      |      |         |
|-----|----------------|------------------------------|-----|------|------|---------|------------------------|-----|------|------|---------|-----------------------------------|-----|------|------|---------|
|     |                | C1                           | C2  | C3   | Mean | Patient | C1                     | C2  | C3   | Mean | Patient | C1                                | C2  | C3   | Mean | Patient |
| 1.  | V $\beta$ 1    | 2.8                          | 2.4 | 3.4  | 2.9  | 2       | 5.4                    | 3.4 | 3    | 3.9  | 1.8     | 3.9                               | 4.3 | 1    | 3.1  | 2.2     |
| 2.  | V $\beta$ 2    | 6.2                          | 7.4 | 11.1 | 8.2  | 6.3     | 4.1                    | 2.3 | 4.7  | 3.7  | 16.7    | 3.1                               | 6.8 | 10.8 | 6.9  | 10.0    |
| 3.  | V $\beta$ 3    | 1.5                          | 4.1 | 4.6  | 3.4  | 1.4     | 0.3                    | 2.9 | 5.7  | 3.0  | 0.6     | 1.2                               | 0   | 3.3  | 1.5  | 1.0     |
| 4.  | V $\beta$ 4    | 2.2                          | 2.2 | 2.1  | 2.2  | 1.8     | 0.5                    | 1.5 | 1.4  | 1.1  | 0.2     | 1.8                               | 1.6 | 1    | 1.5  | 1.8     |
| 5.  | V $\beta$ 5.1  | 6.6                          | 6   | 7.3  | 6.6  | 5.8     | 1.6                    | 5.4 | 1.6  | 2.9  | 0.6     | 7.6                               | 3.1 | 9.9  | 6.9  | 5.2     |
| 6.  | V $\beta$ 5.2  | 0.9                          | 1   | 0.7  | 0.9  | 0.6     | 0.4                    | 0.6 | 0.3  | 0.4  | 0.1     | 2.3                               | 2.3 | 0.5  | 1.7  | 0.4     |
| 7.  | V $\beta$ 5.3  | 1.2                          | 1.2 | 1.3  | 1.2  | 1.7     | 0.7                    | 0.8 | 1    | 0.8  | 0.1     | 0                                 | 1.3 | 0.5  | 0.6  | 0.9     |
| 8.  | V $\beta$ 7.1  | 1.9                          | 2   | 2.3  | 2.1  | 1.5     | 1.4                    | 2.5 | 3    | 2.3  | 1.4     | 1.2                               | 1.3 | 2.7  | 1.7  | 2.5     |
| 9.  | V $\beta$ 7.2  | 1.6                          | 1.2 | 1.1  | 1.3  | 0.7     | 1.9                    | 1.3 | 1.7  | 1.6  | 1.8     | 0.9                               | 0   | 1.5  | 0.8  | 1.2     |
| 10. | V $\beta$ 8    | 4.9                          | 3.8 | 4.7  | 4.5  | 2.8     | 2.1                    | 2.9 | 6.5  | 3.8  | 1.8     | 8.4                               | 0.9 | 1.9  | 3.7  | 3.0     |
| 11. | V $\beta$ 9    | 3.5                          | 4   | 6.2  | 4.6  | 5.3     | 0.9                    | 2.5 | 15.3 | 6.2  | 0.8     | 6                                 | 4.3 | 6.9  | 5.7  | 5.5     |
| 12. | V $\beta$ 11   | 0.8                          | 0.8 | 1.3  | 1.0  | 0.7     | 0.4                    | 1   | 0.9  | 0.8  | 0.1     | 0                                 | 0   | 1.4  | 0.5  | 2.8     |
| 13. | V $\beta$ 12   | 1.5                          | 2.1 | 2.4  | 2.0  | 1.9     | 0.6                    | 0.8 | 0.9  | 0.8  | 0.6     | 2.3                               | 2.3 | 0.5  | 1.7  | 1.4     |
| 14. | V $\beta$ 13.1 | 4.1                          | 4.3 | 3.6  | 4.0  | 3.4     | 1.1                    | 3.4 | 3.2  | 2.6  | 3.9     | 4.7                               | 2.8 | 3.4  | 3.6  | 3.9     |
| 15. | V $\beta$ 13.2 | 4.7                          | 3   | 2.7  | 3.5  | 3.2     | 4.3                    | 3.1 | 3.9  | 3.8  | 1.1     | 8                                 | 2.4 | 2.4  | 4.3  | 4.6     |
| 16. | V $\beta$ 13.6 | 1.7                          | 1.7 | 1.4  | 1.6  | 1.8     | 0.5                    | 0.9 | 0.8  | 0.7  | 0.4     | 2.8                               | 1.9 | 1    | 1.9  | 2.3     |
| 17. | V $\beta$ 14   | 2.2                          | 2.2 | 1.9  | 2.1  | 1.6     | 2.7                    | 4   | 3.1  | 3.3  | 2.0     | 2.2                               | 4.1 | 2.9  | 3.1  | 0.8     |
| 18. | V $\beta$ 16   | 1                            | 0.7 | 1    | 0.9  | 0.6     | 0.7                    | 2.9 | 0.8  | 1.5  | 0.5     | 2                                 | 2.2 | 0.9  | 1.7  | 0       |
| 19. | V $\beta$ 17   | 4.4                          | 8.4 | 5.6  | 6.1  | 11.3    | 2.1                    | 3.3 | 3    | 2.8  | 0.1     | 4                                 | 6.5 | 5.6  | 5.4  | 6.5     |
| 20. | V $\beta$ 18   | 0.3                          | 0.4 | 0.9  | 0.5  | 0.3     | 0.6                    | 0.3 | 0.5  | 0.5  | 1.4     | 0                                 | 1   | 0    | 0.3  | 0.4     |
| 21. | V $\beta$ 20   | 0                            | 0   | 0.3  | 0.1  | 0       | 0                      | 0   | 0.1  | 0    | 0       | 0                                 | 0   | 0.5  | 0.2  | 0       |
| 22. | V $\beta$ 21.3 | 2.4                          | 1.9 | 2.7  | 2.3  | 3.2     | 1.1                    | 3.1 | 1.4  | 1.9  | 2.9     | 1.9                               | 0.7 | 1.6  | 1.4  | 3.1     |
| 23. | V $\beta$ 22   | 3                            | 4.3 | 4    | 3.8  | 11.6    | 2.5                    | 2.7 | 4.1  | 3.1  | 1.8     | 3.9                               | 2.7 | 1.4  | 2.7  | 4.7     |
| 24. | V $\beta$ 23   | 0.6                          | 0.6 | 0.7  | 0.6  | 0.8     | 0.6                    | 1.2 | 0.8  | 0.9  | 7.4     | 1                                 | 1.4 | 0    | 0.8  | 1.4     |



**Table S2. Characteristics of TCR Vb2+CD8+ T cells in the patient and healthy donors.**

The table depicts frequency (%) of naïve ( $T_N$ ), central memory ( $T_{CM}$ ), effector memory ( $T_{EM}$ ) and effector memory CD8<sup>+</sup> T cells that re-expressed CD45RA ( $T_{EMRA}$ ) within TCR Vb2+CD8+ T-cell population. In addition, distribution of cells expressing perforin ( $P$ ), activation marker 4-1BB, IFN- $\gamma$  and IL-10 is also shown for the studied TCR V $\beta$ 2+CD8+ T-cell population. Each time results for the patient and healthy donors (HD) are shown. Individual results for three HD ( $HD1$ ,  $HD2$  and  $HD3$ ) are shown together with the mean value (*Mean*). The most striking differences between the patient and HD are marked in gray.

|                       | Subpopulation                       | TCR Vb2 <sup>+</sup> CD8 <sup>+</sup> T cells |      |      |      |         |
|-----------------------|-------------------------------------|-----------------------------------------------|------|------|------|---------|
|                       |                                     | HD1                                           | HD2  | HD3  | Mean | Patient |
| Naive & memory        | $T_N$ [%]                           | 20.8                                          | 55.9 | 43.7 | 40.1 | 4.1     |
|                       | $T_{CM}$ [%]                        | 18.3                                          | 17.9 | 12.2 | 16.1 | 3.1     |
|                       | $T_{EM}$ [%]                        | 25.5                                          | 20.1 | 35.9 | 27.2 | 9.1     |
|                       | $T_{EMRA}$ [%]                      | 35.4                                          | 6.1  | 8.2  | 16.6 | 83.7    |
| Perforin & 4-1BB      | P+4-1BB- [%]                        | 1.4                                           | 0    | 21.7 | 7.7  | 3.4     |
|                       | P+4-1BB+ [%]                        | 28.7                                          | 3.3  | 30   | 20.7 | 82.1    |
|                       | P-4-1BB- [%]                        | 8.6                                           | 8.1  | 23.8 | 13.5 | 0.4     |
|                       | P-4-1BB+ [%]                        | 61.3                                          | 88.6 | 24.5 | 58.1 | 14.1    |
| IL-10 & IFN- $\gamma$ | IL10+IFN- $\gamma$ [%]              | 42.8                                          | 65.3 | 0.3  | 36.1 | 37.6    |
|                       | IL10+IFN- $\gamma$ <sup>+</sup> [%] | 33.6                                          | 11.6 | 29.1 | 24.8 | 40.8    |
|                       | IL10-IFN- $\gamma$ [%]              | 7.6                                           | 18.6 | 0.2  | 8.8  | 8.2     |
|                       | IL10-IFN- $\gamma$ <sup>+</sup> [%] | 16                                            | 4.6  | 70.4 | 30.3 | 13.4    |

**Table S3. Proportions of NK cell subsets and analysis of their cytotoxic potential.**

The table depicts distribution of five NK cell subsets and expression of perforin (*P*) and granzyme A (*G*) in CD56dimCD16+, CD56brightCD16dim and CD56-CD16+ NK cell populations. Each time results for the patient and healthy donors (*HD*) are shown. Individual results for three HD (*HD1*, *HD2* and *HD3*) are shown together with the mean value (*Mean*). The most striking differences between the patient and HD are marked in gray.

|                       | Subpopulation         | NK cells |      |      |      |         |
|-----------------------|-----------------------|----------|------|------|------|---------|
|                       |                       | HD1      | HD2  | HD3  | Mean | Patient |
| NK cell subsets       | CD56dimCD16+ [%]      | 82.8     | 88.1 | 90.4 | 87.1 | 73      |
|                       | CD56brightCD16- [%]   | 2.8      | 3.0  | 0.8  | 2.2  | 0.8     |
|                       | CD56dimCD16- [%]      | 2.8      | 2.2  | 3    | 2.7  | 3.5     |
|                       | CD56brightCD16dim [%] | 4.2      | 1.4  | 0.5  | 2.0  | 1.0     |
|                       | CD56-CD16+ [%]        | 7.4      | 5.3  | 5.3  | 6.0  | 21.7    |
| CD56dim<br>CD16+      | G+P- [%]              | 4.8      | 4.2  | 1.5  | 3.5  | 1.7     |
|                       | G+P+ [%]              | 94       | 95.4 | 98.4 | 95.9 | 97.5    |
|                       | G-P- [%]              | 1.0      | 0.1  | 0.1  | 0.4  | 0.2     |
|                       | G- P+ [%]             | 0.2      | 0.3  | 0    | 0.2  | 0.6     |
| CD56bright<br>CD16dim | G+P- [%]              | 53.1     | 38.1 | 12.9 | 34.7 | 20.5    |
|                       | G+P+ [%]              | 28.7     | 38.2 | 87.1 | 51.3 | 52.3    |
|                       | G-P- [%]              | 15.0     | 23.7 | 0    | 12.9 | 4.5     |
|                       | G- P+ [%]             | 3.2      | 0    | 0    | 1.1  | 22.7    |
| CD56-<br>CD16+        | G+P- [%]              | 48.0     | 49.8 | 36.4 | 44.7 | 83.4    |
|                       | G+P+ [%]              | 38.1     | 28.7 | 53.7 | 40.2 | 15.6    |
|                       | G-P- [%]              | 13.0     | 21.5 | 9.1  | 14.5 | 1.0     |
|                       | G- P+ [%]             | 0.9      | 0    | 0.8  | 0.6  | 0       |
